# Supplementary material
Source: PubMed Central journal article supplement (PMC6736779)
Supplement: NIHMS1535885-supplement-1.pdf [file NIHMS1535885-supplement-1.pdf]

## SUPPLEMENTARY TABLES

### Molecular profiling and molecular classification of endometrioid ovarian carcinomas

Cybulska et al.

**Supplementary Table 1.** Sequencing statistics of the endometrioid ovarian cancers subjected to targeted massively parallel sequencing (MSK-IMPACT).

| Sample ID | Target Territory | Total Reads | Mean Target Coverage (X) | Percent Target Bases 10X | Percent Target Bases 50X | Percent Target Bases 100X |
|-----------|------------------|-------------|--------------------------|--------------------------|--------------------------|---------------------------|
| EOC1-T    | 1362579          | 26981555    | 832.6                    | 0.992301                 | 0.9885                   | 0.983727                  |
| EOC1-N    | 1362579          | 9012589     | 330.5                    | 0.989449                 | 0.977683                 | 0.952661                  |
| EOC2-T    | 1522367          | 27799413    | 821.6                    | 0.992176                 | 0.987666                 | 0.982582                  |
| EOC2-N    | 1522367          | 25743497    | 829.6                    | 0.992627                 | 0.988468                 | 0.983672                  |
| EOC3-T    | 1204666          | 36554101    | 311.9                    | 0.989513                 | 0.97799                  | 0.962945                  |
| EOC3-N    | 1204666          | 11067848    | 319.0                    | 0.986678                 | 0.958737                 | 0.913894                  |
| EOC4-T    | 1362579          | 24458509    | 674.6                    | 0.990581                 | 0.983183                 | 0.975235                  |
| EOC4-N    | 1362579          | 17309231    | 574.5                    | 0.991264                 | 0.983963                 | 0.974153                  |
| EOC5-T    | 1362579          | 28828819    | 806.1                    | 0.990848                 | 0.984312                 | 0.977287                  |
| EOC5-N    | 1362579          | 9150471     | 325.9                    | 0.989308                 | 0.975459                 | 0.953571                  |
| EOC6-T    | 1522367          | 34141414    | 922.8                    | 0.99497                  | 0.99236                  | 0.989147                  |
| EOC6-N    | 1522367          | 20865721    | 683.8                    | 0.99289                  | 0.988869                 | 0.983562                  |
| EOC7-T    | 1362579          | 31819782    | 1061.8                   | 0.992413                 | 0.989212                 | 0.985447                  |
| EOC7-N    | 1362579          | 9739153     | 362.4                    | 0.990319                 | 0.980521                 | 0.966054                  |
| EOC9-T    | 1362579          | 32645079    | 1029.0                   | 0.992224                 | 0.98896                  | 0.98449                   |
| EOC9-N    | 1362579          | 23521649    | 812.9                    | 0.992169                 | 0.987702                 | 0.982769                  |

**Supplementary Table 2.** Clinico-pathologic characteristics of the endometrioid ovarian cancers subjected to targeted massively parallel sequencing (MSK-IMPACT).

| <b>Characteristic</b>                    | <b>N (8)</b>     |
|------------------------------------------|------------------|
| <b>Median age at diagnosis (years)</b>   |                  |
| Median (range)                           | 51 (34-68)       |
| <b>FIGO tumor grade at diagnosis</b>     |                  |
| 1                                        | 2                |
| 2                                        | 3                |
| 3                                        | 3                |
| <b>FIGO (2009) stage at diagnosis</b>    |                  |
| I                                        | 5                |
| II                                       | 0                |
| III                                      | 2                |
| IV                                       | 1                |
| <b>History of endometriosis</b>          |                  |
| Yes                                      | 1                |
| No                                       | 7                |
| <b>Endometriosis on pathology report</b> |                  |
| Yes                                      | 4                |
| No                                       | 4                |
| <b>Adjuvant chemotherapy</b>             |                  |
| IV Carboplatin & Paclitaxel              | 6                |
| IV/IP Carboplatin & Paclitaxel           | 2                |
| <b>Median PFS (months) (95% CI)</b>      | 27.2 (15.0-39.4) |
| <b>Deceased at time of follow-up</b>     | 2                |

CI, confidence interval; FIGO, International Federation of Gynecology and Obstetrics; PFS, progression-free survival.

**Supplementary Table 3.** Non-synonymous somatic mutations identified in the endometrioid ovarian cancers subjected to targeted massively parallel sequencing (MSK-IMPACT).

| Sample ID | Chromosome | Position  | Reference Allele      | Alternate Allele | Gene    | Mutation Type     | AA change     | LOH | Tumor MAF | Normal MAF | Tumor Depth | Normal Depth | Hotspot | Pathogenicity     |
|-----------|------------|-----------|-----------------------|------------------|---------|-------------------|---------------|-----|-----------|------------|-------------|--------------|---------|-------------------|
| EOC1-T    | 10         | 89692791  | A                     | G                | PTEN    | Missense_Mutation | p.D92G        | .   | 0.499     | 0          | 359         | 161          | Yes     | likely_pathogenic |
| EOC1-T    | 3          | 41266101  | C                     | G                | CTNNB1  | Missense_Mutation | p.S33C        | .   | 0.243     | 0          | 424         | 271          | Yes     | likely_pathogenic |
| EOC1-T    | 6          | 152419926 | A                     | G                | ESR1    | Missense_Mutation | p.D538G       | .   | 0.238     | 0          | 676         | 220          | Yes     | passenger         |
| EOC1-T    | 5          | 67589535  | A                     | G                | PIK3R1  | Splice_Site       | p.X434_splice | .   | 0.250     | 0          | 268         | 119          | Yes     | likely_pathogenic |
| EOC2-T    | 12         | 25398284  | C                     | A                | KRAS    | Missense_Mutation | p.G12V        | .   | 0.203     | 0.001      | 710         | 719          | Yes     | likely_pathogenic |
| EOC3-T    | 20         | 22562816  | AGGTGGGCCGCGGCC       | A                | FOXA2   | Frame_Shift_Del   | p.L355Hfs*13  | .   | 0.203     | 0          | 69          | 63           | No      | likely_pathogenic |
| EOC3-T    | 12         | 25398284  | C                     | A                | KRAS    | Missense_Mutation | p.G12V        | .   | 0.387     | 0.006      | 287         | 318          | Yes     | likely_pathogenic |
| EOC3-T    | 3          | 178936095 | A                     | G                | PIK3CA  | Missense_Mutation | p.Q546R       | .   | 0.189     | 0          | 175         | 159          | Yes     | likely_pathogenic |
| EOC3-T    | 9          | 21971111  | G                     | A                | CDKN2A  | Missense_Mutation | p.H83Y        | .   | 0.123     | 0          | 155         | 126          | Yes     | likely_pathogenic |
| EOC4-T    | 4          | 140810638 | GGCT                  | G                | MAML3   | In_Frame_Del      | p.P647del     | Yes | 0.081     | 0          | 74          | 63           | No      | passenger         |
| EOC4-T    | 11         | 85979565  | G                     | A                | EED     | Missense_Mutation | p.D310N       | .   | 0.229     | 0          | 520         | 342          | No      | passenger         |
| EOC4-T    | 12         | 25398284  | C                     | G                | KRAS    | Missense_Mutation | p.G12A        | .   | 0.335     | 0          | 322         | 386          | Yes     | likely_pathogenic |
| EOC4-T    | 16         | 89877338  | C                     | G                | FANCA   | Missense_Mutation | p.R142T       | .   | 0.251     | 0          | 303         | 269          | No      | passenger         |
| EOC4-T    | 17         | 66526133  | G                     | C                | PRKAR1A | Missense_Mutation | p.D322H       | .   | 0.242     | 0.003      | 425         | 305          | No      | likely_pathogenic |
| EOC4-T    | 5          | 35871262  | G                     | A                | IL7R    | Missense_Mutation | p.V162I       | .   | 0.246     | 0          | 496         | 312          | No      | passenger         |
| EOC4-T    | 10         | 89685269  | G                     | A                | PTEN    | Splice_Site       | p.X55_splice  | Yes | 0.367     | 0          | 139         | 138          | No      | likely_pathogenic |
| EOC4-T    | 13         | 48941629  | G                     | T                | RB1     | Splice_Site       | p.X314_splice | Yes | 0.457     | 0          | 357         | 264          | No      | likely_pathogenic |
| EOC4-T    | 17         | 7574035   | T                     | C                | FP53    | Splice_Site       | p.X332_splice | Yes | 0.375     | 0          | 355         | 471          | Yes     | likely_pathogenic |
| EOC5-T    | 2          | 202136299 | TCTTTTGCAAGAGGAAATCTC | T                | CASP8   | Frame_Shift_Del   | p.L182Qfs*6   | .   | 0.159     | 0          | 508         | 269          | No      | likely_pathogenic |
| EOC5-T    | 5          | 67589591  | TATA                  | T                | PIK3R1  | In_Frame_Del      | p.Y452del     | .   | 0.323     | 0          | 675         | 194          | Yes     | likely_pathogenic |
| EOC5-T    | 10         | 89653782  | A                     | G                | PTEN    | Missense_Mutation | p.Y27C        | .   | 0.370     | 0          | 516         | 211          | Yes     | likely_pathogenic |
| EOC5-T    | 10         | 89711891  | G                     | A                | PTEN    | Missense_Mutation | p.S170N       | .   | 0.356     | 0.005      | 545         | 196          | Yes     | likely_pathogenic |
| EOC5-T    | 17         | 37880261  | G                     | C                | ERBB2   | Missense_Mutation | p.D769H       | .   | 0.406     | 0          | 640         | 294          | Yes     | likely_pathogenic |
| EOC5-T    | 22         | 50705458  | G                     | A                | MAPK11  | Missense_Mutation | p.A172V       | .   | 0.081     | 0          | 37          | 13           | No      | likely_pathogenic |
| EOC6-T    | 12         | 25398284  | C                     | G                | KRAS    | Missense_Mutation | p.G12A        | .   | 0.087     | 0          | 447         | 540          | Yes     | likely_pathogenic |
| EOC6-T    | 17         | 47699369  | C                     | T                | SPOP    | Missense_Mutation | p.E47K        | .   | 0.068     | 0          | 531         | 499          | No      | likely_pathogenic |
| EOC6-T    | 3          | 49412973  | C                     | T                | RHOA    | Missense_Mutation | p.G17E        | .   | 0.028     | 0          | 891         | 652          | Yes     | likely_pathogenic |
| EOC6-T    | 23         | 44941968  | G                     | C                | KDM6A   | Missense_Mutation | p.R1073T      | .   | 0.065     | 0          | 581         | 496          | No      | passenger         |
| EOC7-T    | 21         | 36171622  | CAG                   | C                | RUNX1   | Frame_Shift_Del   | p.S314Cfs*285 | .   | 0.179     | 0          | 598         | 183          | No      | likely_pathogenic |
| EOC7-T    | 5          | 67589149  | AT                    | A                | PIK3R1  | Frame_Shift_Del   | p.L380*       | .   | 0.186     | 0          | 581         | 189          | Yes     | likely_pathogenic |
| EOC7-T    | 12         | 25398284  | C                     | T                | KRAS    | Missense_Mutation | p.G12D        | .   | 0.204     | 0          | 628         | 219          | Yes     | likely_pathogenic |
| EOC7-T    | 19         | 18278049  | G                     | T                | PIK3R2  | Missense_Mutation | p.D557Y       | .   | 0.362     | 0          | 771         | 270          | Yes     | passenger         |
| EOC7-T    | 2          | 212652853 | C                     | G                | ERBB4   | Missense_Mutation | p.Q151H       | Yes | 0.217     | 0          | 609         | 266          | No      | passenger         |
| EOC7-T    | 4          | 153249385 | G                     | A                | FBXW7   | Missense_Mutation | p.R465C       | Yes | 0.192     | 0.007      | 757         | 279          | Yes     | likely_pathogenic |
| EOC7-T    | 6          | 106547379 | G                     | A                | PRDM1   | Missense_Mutation | p.E206K       | .   | 0.194     | 0          | 602         | 204          | No      | passenger         |
| EOC9-T    | 10         | 63850704  | G                     | GA               | ARID5B  | Frame_Shift_Ins   | p.K494Kfs*31  | Yes | 0.391     | 0.003      | 1146        | 767          | No      | likely_pathogenic |
| EOC9-T    | 19         | 18266781  | T                     | TGGTAGTGAGCC     | PIK3R2  | Frame_Shift_Ins   | p.L31*        | .   | 0.222     | 0          | 595         | 499          | No      | passenger         |
| EOC9-T    | 3          | 69928509  | C                     | T                | MITF    | Missense_Mutation | p.T110M       | .   | 0.422     | 0          | 689         | 553          | No      | passenger         |
| EOC9-T    | 8          | 128750945 | C                     | T                | MYC     | Missense_Mutation | p.S161L       | .   | 0.520     | 0          | 775         | 516          | Yes     | likely_pathogenic |
| EOC9-T    | 23         | 47028776  | G                     | A                | RBM10   | Missense_Mutation | p.G27E        | .   | 0.029     | 0.001      | 752         | 739          | No      | passenger         |
| EOC9-T    | 12         | 57864390  | C                     | T                | GLI1    | Nonsense_Mutation | p.R623*       | .   | 0.431     | 0          | 752         | 735          | No      | passenger         |
| EOC9-T    | 13         | 32914137  | C                     | A                | BRCA2   | Nonsense_Mutation | p.S1882*      | .   | 0.422     | 0.001      | 740         | 757          | No      | likely_pathogenic |
| EOC9-T    | 19         | 41754674  | C                     | T                | AXL     | Nonsense_Mutation | p.Q554*       | .   | 0.576     | 0          | 804         | 721          | No      | passenger         |

**Supplementary Table 4.** Genes with significantly different mutation frequencies between endometrioid ovarian cancers (n=36, this study) and molecular-subtype matched endometrioid endometrial cancers (n=72; The Cancer Genome Atlas).

| Gene Symbol | Endometrioid ovarian cancer (n=36; this study) |                   | Endometrioid endometrial cancer (n=72; TCGA) |                   | p-value    | Adjusted p-value (Benjamini-Hochberg) |
|-------------|------------------------------------------------|-------------------|----------------------------------------------|-------------------|------------|---------------------------------------|
|             | Cases altered (n)                              | Cases altered (%) | Cases altered (n)                            | Cases altered (%) |            |                                       |
| PTEN        | 12                                             | 33.33             | 59                                           | 81.94             | 1.02E-06   | 0.000347041                           |
| PIK3R1      | 4                                              | 11.11             | 30                                           | 41.67             | 0.0010399  | 0.127700181                           |
| KRAS        | 15                                             | 41.67             | 9                                            | 12.50             | 0.00112346 | 0.127700181                           |
| CTCF        | 1                                              | 2.778             | 18                                           | 25.00             | 0.00307688 | 0.262303764                           |
| CREBBP      | 0                                              | 0                 | 8                                            | 11.11             | 0.04993632 | 1                                     |

TCGA, The Cancer Genome Atlas. 341 cancer-related genes (MSK-IMPACT) were assessed.

## Supplementary Table 5: Molecular subtype classification of endometrioid endometrial cancers from The Cancer Genome Atlas (TCGA).

| TCGA ID      | Histology    | Molecular Subtype TCGA | MSI status TCGA | POLE EDM mutation (AA286-471) | TP53 mutation  | Surrogate Molecular Subtype Classification |
|--------------|--------------|------------------------|-----------------|-------------------------------|----------------|--------------------------------------------|
| TCGA-A5-A0GN | Endometrioid | CN high                | MSS             | no alteration                 | no alteration  | CN low                                     |
| TCGA-A5-A0GJ | Endometrioid | CN high                | MSS             | no alteration                 | yes (H193R)    | CN high                                    |
| TCGA-A5-A0R7 | Endometrioid | CN high                | MSS             | no alteration                 | yes (L43*)     | CN high                                    |
| TCGA-AP-A053 | Endometrioid | CN high                | MSS             | no alteration                 | yes (R248Z)    | CN high                                    |
| TCGA-AP-A01F | Endometrioid | CN high                | MSS             | no alteration                 | yes (R273S)    | CN high                                    |
| TCGA-AX-A06B | Endometrioid | CN high                | MSS             | no alteration                 | yes (G262V)    | CN high                                    |
| TCGA-B5-A0K3 | Endometrioid | CN high                | MSS             | no alteration                 | yes (H178D)    | CN high                                    |
| TCGA-B5-A111 | Endometrioid | CN high                | MSS             | no alteration                 | yes (R306*)    | CN high                                    |
| TCGA-BG-A0M8 | Endometrioid | CN high                | MSS             | no alteration                 | yes (Y220C)    | CN high                                    |
| TCGA-BG-A19C | Endometrioid | CN high                | MSS             | no alteration                 | yes (Y220C)    | CN high                                    |
| TCGA-BK-A139 | Endometrioid | CN high                | MSS             | no alteration                 | yes (R282V)    | CN high                                    |
| TCGA-B5-A0T1 | Endometrioid | CN high                | MSS             | no alteration                 | yes (C238Y)    | CN high                                    |
| TCGA-B5-A0J9 | Endometrioid | CN high                | MSS             | no alteration                 | yes (N239D)    | CN high                                    |
| TCGA-B5-A0V8 | Endometrioid | CN high                | MSS             | no alteration                 | yes (Y220C)    | CN high                                    |
| TCGA-D1-A159 | Endometrioid | CN high                | MSS             | no alteration                 | yes (C141Y)    | CN high                                    |
| TCGA-D1-A17K | Endometrioid | CN high                | MSS             | no alteration                 | yes (C167His*) | CN high                                    |
| TCGA-BG-A0M7 | Endometrioid | CN low                 | MSS             | no alteration                 | yes (C238F)    | CN high                                    |
| TCGA-BG-A0VX | Endometrioid | CN low                 | MSS             | yes (L424V)                   | no alteration  | POLE                                       |
| TCGA-A5-A0GE | Endometrioid | CN low                 | MSS             | no alteration                 | no alteration  | CN low                                     |
| TCGA-A5-A0GM | Endometrioid | CN low                 | MSS             | no alteration                 | no alteration  | CN low                                     |
| TCGA-A5-A0Q2 | Endometrioid | CN low                 | MSS             | no alteration                 | no alteration  | CN low                                     |
| TCGA-A5-A0GU | Endometrioid | CN low                 | MSS             | no alteration                 | no alteration  | CN low                                     |
| TCGA-A5-A0GV | Endometrioid | CN low                 | MSS             | no alteration                 | no alteration  | CN low                                     |
| TCGA-A5-A0GX | Endometrioid | CN low                 | MSS             | no alteration                 | no alteration  | CN low                                     |
| TCGA-A5-A0R8 | Endometrioid | CN low                 | MSS             | no alteration                 | no alteration  | CN low                                     |
| TCGA-A5-A0R9 | Endometrioid | CN low                 | MSS             | no alteration                 | no alteration  | CN low                                     |
| TCGA-A5-A0RA | Endometrioid | CN low                 | MSS             | no alteration                 | no alteration  | CN low                                     |
| TCGA-AP-A05P | Endometrioid | CN low                 | MSS             | no alteration                 | no alteration  | CN low                                     |
| TCGA-AP-A0LJ | Endometrioid | CN low                 | MSS             | no alteration                 | no alteration  | CN low                                     |
| TCGA-AP-A0LL | Endometrioid | CN low                 | MSS             | no alteration                 | no alteration  | CN low                                     |
| TCGA-AP-A0LN | Endometrioid | CN low                 | MSS             | no alteration                 | no alteration  | CN low                                     |
| TCGA-AP-A0LO | Endometrioid | CN low                 | MSS             | no alteration                 | no alteration  | CN low                                     |
| TCGA-AP-A0LV | Endometrioid | CN low                 | MSS             | no alteration                 | no alteration  | CN low                                     |
| TCGA-AX-A05T | Endometrioid | CN low                 | MSS             | no alteration                 | no alteration  | CN low                                     |
| TCGA-AX-A05U | Endometrioid | CN low                 | MSS             | no alteration                 | no alteration  | CN low                                     |
| TCGA-AX-A05Z | Endometrioid | CN low                 | MSS             | no alteration                 | no alteration  | CN low                                     |
| TCGA-AX-A05S | Endometrioid | CN low                 | MSS             | no alteration                 | no alteration  | CN low                                     |
| TCGA-B5-A0US | Endometrioid | CN low                 | MSS             | no alteration                 | no alteration  | CN low                                     |
| TCGA-B5-A0JT | Endometrioid | CN low                 | MSS             | no alteration                 | no alteration  | CN low                                     |
| TCGA-B5-A0K0 | Endometrioid | CN low                 | MSS             | no alteration                 | no alteration  | CN low                                     |
| TCGA-B5-A0K1 | Endometrioid | CN low                 | MSS             | no alteration                 | no alteration  | CN low                                     |
| TCGA-B5-A0K4 | Endometrioid | CN low                 | MSS             | no alteration                 | no alteration  | CN low                                     |
| TCGA-B5-A0K7 | Endometrioid | CN low                 | MSS             | no alteration                 | no alteration  | CN low                                     |
| TCGA-B5-A11F | Endometrioid | CN low                 | MSS             | no alteration                 | no alteration  | CN low                                     |
| TCGA-B5-A110 | Endometrioid | CN low                 | MSS             | no alteration                 | no alteration  | CN low                                     |
| TCGA-B5-A11Q | Endometrioid | CN low                 | MSS             | no alteration                 | no alteration  | CN low                                     |
| TCGA-B5-A11S | Endometrioid | CN low                 | MSS             | no alteration                 | no alteration  | CN low                                     |
| TCGA-B5-A11V | Endometrioid | CN low                 | MSS             | no alteration                 | no alteration  | CN low                                     |
| TCGA-B5-A11W | Endometrioid | CN low                 | MSS             | no alteration                 | no alteration  | CN low                                     |
| TCGA-B5-A11Y | Endometrioid | CN low                 | MSI-L           | no (P102L,R34C)               | no alteration  | CN low                                     |
| TCGA-B5-A11Z | Endometrioid | CN low                 | MSS             | no alteration                 | no alteration  | CN low                                     |
| TCGA-B5-A121 | Endometrioid | CN low                 | MSS             | no alteration                 | no alteration  | CN low                                     |
| TCGA-BG-A0LW | Endometrioid | CN low                 | MSS             | no alteration                 | no alteration  | CN low                                     |
| TCGA-BG-A0M2 | Endometrioid | CN low                 | MSS             | no alteration                 | no alteration  | CN low                                     |
| TCGA-BG-A0M3 | Endometrioid | CN low                 | MSS             | no alteration                 | no alteration  | CN low                                     |
| TCGA-BG-A0M9 | Endometrioid | CN low                 | MSS             | no alteration                 | no alteration  | CN low                                     |
| TCGA-BG-A0MC | Endometrioid | CN low                 | MSS             | no alteration                 | no alteration  | CN low                                     |
| TCGA-BG-A0MG | Endometrioid | CN low                 | MSS             | no alteration                 | no alteration  | CN low                                     |
| TCGA-BG-A0MI | Endometrioid | CN low                 | MSS             | no alteration                 | no alteration  | CN low                                     |
| TCGA-BG-A0MO | Endometrioid | CN low                 | MSS             | no alteration                 | no alteration  | CN low                                     |
| TCGA-BG-A0MS | Endometrioid | CN low                 | MSS             | no alteration                 | no alteration  | CN low                                     |
| TCGA-BG-A0MT | Endometrioid | CN low                 | MSS             | no alteration                 | no alteration  | CN low                                     |
| TCGA-BG-A0MU | Endometrioid | CN low                 | MSS             | no alteration                 | no alteration  | CN low                                     |
| TCGA-BG-A0RY | Endometrioid | CN low                 | MSS             | no alteration                 | no alteration  | CN low                                     |
| TCGA-BG-A0VT | Endometrioid | CN low                 | MSS             | no alteration                 | no alteration  | CN low                                     |
| TCGA-BG-A0VV | Endometrioid | CN low                 | MSS             | no alteration                 | no alteration  | CN low                                     |
| TCGA-BG-A0W1 | Endometrioid | CN low                 | MSS             | no alteration                 | no alteration  | CN low                                     |
| TCGA-BG-A0W2 | Endometrioid | CN low                 | MSS             | no alteration                 | no alteration  | CN low                                     |
| TCGA-BG-A0YU | Endometrioid | CN low                 | MSS             | no alteration                 | no alteration  | CN low                                     |
| TCGA-BG-A186 | Endometrioid | CN low                 | MSS             | no alteration                 | no alteration  | CN low                                     |
| TCGA-BG-A187 | Endometrioid | CN low                 | MSI-L           | no alteration                 | no alteration  | CN low                                     |
| TCGA-BG-A18A | Endometrioid | CN low                 | MSS             | no (R076S)                    | no alteration  | CN low                                     |
| TCGA-BG-A2AE | Endometrioid | CN low                 | MSS             | no alteration                 | no alteration  | CN low                                     |
| TCGA-BK-A0CB | Endometrioid | CN low                 | MSS             | no alteration                 | no alteration  | CN low                                     |
| TCGA-BK-A13C | Endometrioid | CN low                 | MSS             | no alteration                 | no alteration  | CN low                                     |
| TCGA-B5-A0T9 | Endometrioid | CN low                 | MSS             | no alteration                 | no alteration  | CN low                                     |
| TCGA-B5-A0T0 | Endometrioid | CN low                 | MSS             | no alteration                 | no alteration  | CN low                                     |
| TCGA-B5-A0TG | Endometrioid | CN low                 | MSS             | no alteration                 | no alteration  | CN low                                     |
| TCGA-B5-A0U5 | Endometrioid | CN low                 | MSS             | no alteration                 | no alteration  | CN low                                     |
| TCGA-B5-A0UT | Endometrioid | CN low                 | MSS             | no alteration                 | no alteration  | CN low                                     |
| TCGA-B5-A0V6 | Endometrioid | CN low                 | MSS             | no alteration                 | no alteration  | CN low                                     |
| TCGA-B5-A0WQ | Endometrioid | CN low                 | MSS             | no alteration                 | no alteration  | CN low                                     |
| TCGA-D1-A0ZN | Endometrioid | CN low                 | MSS             | no alteration                 | no alteration  | CN low                                     |
| TCGA-D1-A0ZQ | Endometrioid | CN low                 | MSS             | no alteration                 | no alteration  | CN low                                     |
| TCGA-D1-A0ZR | Endometrioid | CN low                 | MSS             | no alteration                 | no alteration  | CN low                                     |
| TCGA-D1-A0ZU | Endometrioid | CN low                 | MSS             | no alteration                 | no alteration  | CN low                                     |
| TCGA-D1-A0ZV | Endometrioid | CN low                 | MSS             | no alteration                 | no alteration  | CN low                                     |
| TCGA-D1-A102 | Endometrioid | CN low                 | MSS             | no alteration                 | no alteration  | CN low                                     |
| TCGA-D1-A15W | Endometrioid | CN low                 | MSS             | no alteration                 | no alteration  | CN low                                     |
| TCGA-D1-A15Z | Endometrioid | CN low                 | MSI-L           | no alteration                 | no alteration  | CN low                                     |
| TCGA-D1-A161 | Endometrioid | CN low                 | MSS             | no alteration                 | no alteration  | CN low                                     |
| TCGA-D1-A165 | Endometrioid | CN low                 | MSS             | no alteration                 | no alteration  | CN low                                     |
| TCGA-D1-A168 | Endometrioid | CN low                 | MSS             | no alteration                 | no alteration  | CN low                                     |

| TCGA ID      | Histology    | Molecular Subtype TCGA | MSI status TCGA | POLE EDM mutation (AA286-471)              | TP53 mutation            | Surrogate Molecular Subtype Classification |
|--------------|--------------|------------------------|-----------------|--------------------------------------------|--------------------------|--------------------------------------------|
| TCGA-D1-A16B | Endometrioid | CN low                 | MSS             | no alteration                              | no alteration            | CN low                                     |
| TCGA-D1-A16D | Endometrioid | CN low                 | MSS             | no alteration                              | no alteration            | CN low                                     |
| TCGA-D1-A16E | Endometrioid | CN low                 | MSS             | no alteration                              | no alteration            | CN low                                     |
| TCGA-D1-A16J | Endometrioid | CN low                 | MSS             | no alteration                              | no alteration            | CN low                                     |
| TCGA-D1-A16Q | Endometrioid | CN low                 | MSS             | no alteration                              | no alteration            | CN low                                     |
| TCGA-D1-A16G | Endometrioid | CN low                 | MSS             | no alteration                              | no alteration            | CN low                                     |
| TCGA-D1-A17C | Endometrioid | CN low                 | MSS             | no alteration                              | no alteration            | CN low                                     |
| TCGA-D1-A17L | Endometrioid | CN low                 | MSS             | no alteration                              | no alteration            | CN low                                     |
| TCGA-D1-A17N | Endometrioid | CN low                 | MSS             | no alteration                              | no alteration            | CN low                                     |
| TCGA-D1-A17S | Endometrioid | CN low                 | MSS             | no alteration                              | no alteration            | CN low                                     |
| TCGA-D1-A17T | Endometrioid | CN low                 | MSS             | no alteration                              | no alteration            | CN low                                     |
| TCGA-AX-A0J1 | Endometrioid | MSI                    | MSI-H           | yes (A465V)                                | no alteration            | POLE                                       |
| TCGA-B5-A11H | Endometrioid | MSI                    | MSI-H           | yes (Q453R)                                | no alteration            | POLE                                       |
| TCGA-A5-A0G9 | Endometrioid | MSI                    | MSI-H           | no alteration                              | no alteration            | MSI                                        |
| TCGA-A5-A0GA | Endometrioid | MSI                    | MSI-H           | no alteration                              | no alteration            | MSI                                        |
| TCGA-A5-A0GB | Endometrioid | MSI                    | MSI-H           | no alteration                              | no alteration            | MSI                                        |
| TCGA-A5-A0GH | Endometrioid | MSI                    | MSI-H           | no alteration                              | no alteration            | MSI                                        |
| TCGA-A5-A0GI | Endometrioid | MSI                    | MSI-H           | no alteration                              | no alteration            | MSI                                        |
| TCGA-A5-A0GQ | Endometrioid | MSI                    | MSI-H           | no alteration                              | yes (I232T)              | MSI                                        |
| TCGA-A5-A0GP | Endometrioid | MSI                    | MSI-H           | no (A1140T)                                | no alteration            | MSI                                        |
| TCGA-A5-A0VQ | Endometrioid | MSI                    | MSI-H           | no (Y1889C)                                | yes (R158C)              | MSI                                        |
| TCGA-AP-A054 | Endometrioid | MSI                    | MSI-H           | no (Y1889C)                                | yes (R158C)              | MSI                                        |
| TCGA-AP-A05N | Endometrioid | MSI                    | MSI-H           | no alteration                              | no alteration            | MSI                                        |
| TCGA-AP-A0LD | Endometrioid | MSI                    | MSI-H           | no alteration                              | no alteration            | MSI                                        |
| TCGA-AP-A0LE | Endometrioid | MSI                    | MSI-H           | no alteration                              | no alteration            | MSI                                        |
| TCGA-AP-A0LG | Endometrioid | MSI                    | MSI-H           | no alteration                              | no alteration            | MSI                                        |
| TCGA-AP-A0LP | Endometrioid | MSI                    | MSI-H           | no alteration                              | no alteration            | MSI                                        |
| TCGA-AP-A0LT | Endometrioid | MSI                    | MSI-H           | no alteration                              | no alteration            | MSI                                        |
| TCGA-AX-A05S | Endometrioid | MSI                    | MSI-H           | no alteration                              | no alteration            | MSI                                        |
| TCGA-AX-A05Y | Endometrioid | MSI                    | MSI-H           | no alteration                              | no alteration            | MSI                                        |
| TCGA-AX-A056 | Endometrioid | MSI                    | MSI-H           | no alteration                              | S240G                    | MSI                                        |
| TCGA-AX-A053 | Endometrioid | MSI                    | MSI-H           | no alteration                              | no alteration            | MSI                                        |
| TCGA-AX-A054 | Endometrioid | MSI                    | MSI-H           | no alteration                              | no alteration            | MSI                                        |
| TCGA-AX-A05H | Endometrioid | MSI                    | MSI-H           | no alteration                              | no alteration            | MSI                                        |
| TCGA-B5-A0JZ | Endometrioid | MSI                    | MSI-H           | no alteration                              | no alteration            | MSI                                        |
| TCGA-B5-A0K2 | Endometrioid | MSI                    | MSI-H           | no alteration                              | no alteration            | MSI                                        |
| TCGA-B5-A0K6 | Endometrioid | MSI                    | MSI-H           | no alteration                              | no alteration            | MSI                                        |
| TCGA-B5-A11G | Endometrioid | MSI                    | MSI-H           | no alteration                              | no alteration            | MSI                                        |
| TCGA-B5-A11J | Endometrioid | MSI                    | MSI-H           | no alteration                              | yes (G244S)              | MSI                                        |
| TCGA-B5-A11U | Endometrioid | MSI                    | MSI-H           | no alteration                              | no alteration            | MSI                                        |
| TCGA-B5-A11E | Endometrioid | MSI                    | MSI-H           | no (E1698D)                                | no alteration            | MSI                                        |
| TCGA-B5-A0M4 | Endometrioid | MSI                    | MSI-H           | no alteration                              | no alteration            | MSI                                        |
| TCGA-BG-A0M0 | Endometrioid | MSI                    | MSI-H           | no alteration                              | no alteration            | MSI                                        |
| TCGA-BG-A0VW | Endometrioid | MSI                    | MSI-H           | no alteration                              | no alteration            | MSI                                        |
| TCGA-BG-A0VZ | Endometrioid | MSI                    | MSI-H           | no alteration                              | no alteration            | MSI                                        |
| TCGA-B5-A188 | Endometrioid | MSI                    | MSI-H           | no alteration                              | no alteration            | MSI                                        |
| TCGA-BK-A0C9 | Endometrioid | MSI                    | MSI-H           | no alteration                              | no alteration            | MSI                                        |
| TCGA-B5-A0TA | Endometrioid | MSI                    | MSI-H           | no alteration                              | no alteration            | MSI                                        |
| TCGA-B5-A0TE | Endometrioid | MSI                    | MSI-H           | no alteration                              | no alteration            | MSI                                        |
| TCGA-B5-A0TJ | Endometrioid | MSI                    | MSI-H           | no alteration                              | no alteration            | MSI                                        |
| TCGA-B5-A0UT | Endometrioid | MSI                    | MSI-H           | no alteration                              | no alteration            | MSI                                        |
| TCGA-B5-A0UB | Endometrioid | MSI                    | MSI-H           | no alteration                              | no alteration            | MSI                                        |
| TCGA-B5-A0UA | Endometrioid | MSI                    | MSI-H           | no alteration                              | no alteration            | MSI                                        |
| TCGA-B5-A0UJ | Endometrioid | MSI                    | MSI-H           | no alteration                              | no alteration            | MSI                                        |
| TCGA-B5-A0UL | Endometrioid | MSI                    | MSI-H           | no alteration                              | no alteration            | MSI                                        |
| TCGA-D1-A0ZQ | Endometrioid | MSI                    | MSI-H           | no alteration                              | no alteration            | MSI                                        |
| TCGA-D1-A0ZS | Endometrioid | MSI                    | MSI-H           | no alteration                              | no alteration            | MSI                                        |
| TCGA-D1-A101 | Endometrioid | MSI                    | MSI-H           | no alteration                              | no alteration            | MSI                                        |
| TCGA-D1-A160 | Endometrioid | MSI                    | MSI-H           | no alteration                              | no alteration            | MSI                                        |
| TCGA-D1-A163 | Endometrioid | MSI                    | MSI-H           | no alteration                              | no alteration            | MSI                                        |
| TCGA-D1-A167 | Endometrioid | MSI                    | MSI-H           | no alteration                              | no alteration            | MSI                                        |
| TCGA-D1-A16N | Endometrioid | MSI                    | MSI-H           | no alteration                              | yes (N239S)              | MSI                                        |
| TCGA-D1-A174 | Endometrioid | MSI                    | MSI-H           | no alteration                              | no alteration            | MSI                                        |
| TCGA-D1-A176 | Endometrioid | MSI                    | MSI-H           | no alteration                              | no alteration            | MSI                                        |
| TCGA-D1-A177 | Endometrioid | MSI                    | MSI-H           | no alteration                              | no alteration            | MSI                                        |
| TCGA-D1-A17A | Endometrioid | MSI                    | MSI-H           | no alteration                              | no alteration            | MSI                                        |
| TCGA-D1-A178 | Endometrioid | MSI                    | MSI-H           | no alteration                              | no alteration            | MSI                                        |
| TCGA-D1-A17D | Endometrioid | MSI                    | MSI-H           | no alteration                              | no alteration            | MSI                                        |
| TCGA-D1-A17F | Endometrioid | MSI                    | MSI-H           | no alteration                              | no alteration            | MSI                                        |
| TCGA-D1-A17H | Endometrioid | MSI                    | MSI-H           | no alteration                              | no alteration            | MSI                                        |
| TCGA-D1-A17M | Endometrioid | MSI                    | MSI-H           | no alteration                              | no alteration            | MSI                                        |
| TCGA-D1-A17R | Endometrioid | MSI                    | MSI-H           | no alteration                              | no alteration            | MSI                                        |
| TCGA-D1-A17U | Endometrioid | MSI                    | MSI-H           | no alteration                              | no alteration            | MSI                                        |
| TCGA-D1-A0VH | Endometrioid | MSI                    | MSI-H           | no alteration                              | no alteration            | MSI                                        |
| TCGA-A5-A0GP | Endometrioid | POLE                   | MSS             | yes (V411L)                                | no alteration            | POLE                                       |
| TCGA-AP-A051 | Endometrioid | POLE                   | MSI-H           | yes (L424I)                                | no alteration            | POLE                                       |
| TCGA-AP-A056 | Endometrioid | POLE                   | MSI-L           | yes (V411L, R1826W, L1235I)                | no alteration            | POLE                                       |
| TCGA-AP-A059 | Endometrioid | POLE                   | MSI-H           | yes (L212M, S297F, L35M, A25T)             | yes (R273C, S240G, P84T) | POLE                                       |
| TCGA-AP-A0ML | Endometrioid | POLE                   | MSS             | yes (V411L, Q214R)                         | no alteration            | POLE                                       |
| TCGA-AX-A05Z | Endometrioid | POLE                   | MSS             | yes (P286R, S1930*, F1907L)                | no alteration            | POLE                                       |
| TCGA-AX-A0J0 | Endometrioid | POLE                   | MSS             | yes (P286R)                                | no alteration            | POLE                                       |
| TCGA-B5-A0JY | Endometrioid | POLE                   | MSS             | yes (P286R, F815L)                         | no alteration            | POLE                                       |
| TCGA-B5-A11E | Endometrioid | POLE                   | MSS             | yes (R1879C, V411L, R1364C)                | yes (R342*)              | POLE                                       |
| TCGA-B5-A11N | Endometrioid | POLE                   | MSS             | yes (P286R)                                | yes (T250N*8, R209I)     | POLE                                       |
| TCGA-B5-A0TC | Endometrioid | POLE                   | MSS             | yes (M444K)                                | no alteration            | POLE                                       |
| TCGA-B5-A0UF | Endometrioid | POLE                   | MSS             | yes (P286R, C2109R)                        | yes (R213*)              | POLE                                       |
| TCGA-B5-A0UV | Endometrioid | POLE                   | MSS             | yes (P286R, L1561P, S1380L)                | yes (R213*, R158C)       | POLE                                       |
| TCGA-D1-A103 | Endometrioid | POLE                   | MSI-H           | yes (A1967V, S1644L, T1104M, A456P, H144Q) | no alteration            | POLE                                       |
| TCGA-D1-A16X | Endometrioid | POLE                   | MSS             | yes (P286R, D1129G)                        | no alteration            | POLE                                       |
| TCGA-D1-A16Y | Endometrioid | POLE                   | MSI-L           | yes (V411L)                                | yes (R213Q, S241P)       | POLE                                       |
| TCGA-D1-A170 | Endometrioid | POLE                   | MSI-L           | yes (P286R)                                | no alteration            | POLE                                       |

Molecular subtypes: CN high, copy-number high (serous-like); CN low, copy-number low (endometrioid); MSI, MSI (hypermutated); POLE, POLE (ultramutated).

MSI-H, microsatellite instability-high; MSI-L, microsatellite instability-low; MSS, microsatellite stable
